# Supplementary material for: Water proton NMR—a sensitive probe for solute association
Source: Royal Society of Chemistry journal article supplement (doi:10.1039/c5cc00741k), 2015-01-01
Supplement: c5cc00741k1.pdf [file c5cc00741k1.pdf]

## **Electronic Supporting Information**

### **Water Proton NMR—A Sensitive Probe of Solute Association**

Yue Feng, Marc B. Taraban, Yihua Bruce Yu\*

Department of Pharmaceutical Sciences, University of Maryland, Baltimore, MD 21201, USA

\*Corresponding author; +1 410-706-7514; [byu@rx.umaryland.edu](mailto:byu@rx.umaryland.edu)

## **Materials and Methods:**

### **General Information:**

BSA (bovine serum albumin),  $\gamma$ -globulin and sodium octanoate ( $\text{NaC}_8$ ) were purchased from Sigma Aldrich; sodium perfluorooctanoate ( $\text{NaFC}_8$ ) was purchased from Alfa Aesar. All compounds were used without further purification.

NMR experiments were carried out at 9.4 T using a Varian INOVA spectrometer equipped with a broad band probe with Z-gradient; and at 0.47 T using a UNIQ PMR benchtop spectrometer with a 10-mm proton probe.

### **Sample Preparation:**

#### **1. BSA solutions**

BSA was dissolved in phosphate-buffered saline (PBS, 50 sodium phosphate, 100 sodium chloride, pH 7.4) of different concentrations (0, 2, 5, 7, 10, 15, 20, 25 and 30 mg/mL). Aggregation was induced by heating BSA solutions to 55 or 60 °C for 2 – 30 min. The heated solutions were then cooled down to room temperature for NMR or DLS measurements. For the determination of the correlation between the water proton  $R_2$  and the average molecular weight of the aggregate, BSA concentration was fixed at 15 mg/mL.

#### **2. $\gamma$ -Globulin solutions**

$\gamma$ -Globulin was dissolved in PBS at 15 mg/mL. Aggregation was induced by heating in the same way as BSA.

#### **3. Sodium octanoate ( $\text{NaC}_8$ )**

15 samples of different concentrations of  $\text{NaC}_8$  (0.009, 0.014, 0.019, 0.038, 0.075, 0.15, 0.30, 0.60, 0.90, 1.20, 1.50, 1.80, 2.00, 2.20 and 2.40 M) were prepared using volumetric serial dilution from a stock solution of 2.40 M of  $\text{NaC}_8$  in water, which was prepared by gradually adding DI-water to  $\text{NaC}_8$  in a 50-mL centrifuge tube and nutated slowly overnight at room

temperature. Afterwards, the solutions were let to equilibrate at room temperature for 4-6 weeks before measurements.

Previous works on  $\text{NaC}_8$  were mostly reported in molality.<sup>S1</sup> To convert the literature reported CMC values from molality (mol/kg) to molarity (mol/L), the specific density  $\rho$  (in g/mL) of each solution was measured at 22.5°C using a density meter (DMA 5000 from Anton Paar).

#### 4. Sodium perfluorooctanoate ( $\text{NaFC}_8$ )

16 samples of different concentration (1.7, 2.5, 3.9, 5.8, 8.7, 13.0, 19.5, 29.3, 36.6, 43.9, 65.8, 98.8, 148.2, 222.2, 333.3 and 500 mM) were prepared by serial dilution from a stock solution of 500 mM  $\text{NaFC}_8$  in DI water.

#### **NMR experiments:**

In all NMR experiments, the CPMG (Carr-Purcell-Meiboom-Gill) sequence<sup>S2</sup> was used to measure the water proton transverse relaxation time ( $T_2$ ). The relaxation delay ( $dI$ ) was larger than  $5 \times T_1$  in all cases. The water proton  $T_2$  value can be extracted from the following equation:

$$I(t) = I_0 \times \exp(-t/T_2) \quad (1)$$

where  $I(t)$  is the water proton signal intensity at time  $t$ ;  $I_0$  is the initial signal intensity when  $t = 0$ ; and  $t$  is the  $T_2$  delay time. By increasing  $t$ , a signal intensity decay curve can be obtained. The relaxation constant  $T_2$  was extracted by fitting the  $I(t)$  vs.  $t$  curve to Eqn. 1.

For all NMR experiments carried out at 9.4 T, the sample was loaded into a 3-mm NMR tube, which was then inserted into a 5-mm NMR tube that was preloaded with  $\text{D}_2\text{O}$  and trace amount of trimethylsilyl propionate (TSP) to provide the deuterium lock signal and chemical shift reference. At 9.4 T, a small flip-angle excitation pulse (about 10°) was used to avoid overflowing the receiver by the water proton signal.

## 1. BSA solutions

For the CPMG experiments at 9.4 T, the interval between the  $180^\circ$  pulses ( $2\tau$ ) was 120  $\mu\text{s}$ , and 4 transients ( $nt=4$ ) were collected. Ten different values of  $t$ , the  $T_2$  delay time, were used ( $t = 2n\tau$ ,  $n$  is the number of  $180^\circ$  pulses. The  $t$  value was varied by varying  $n$  while  $\tau$  was fixed at 120  $\mu\text{s}$ ). To get good fitting results, these parameters were optimized based on the specific  $T_2$  value of each sample.

For the CPMG experiments at 0.47 T, the interval between the  $180^\circ$  pulses ( $2\tau$ ) was 2 ms. Instead of using the peak area as the signal intensity, the amplitude of the FID of each CPMG echo was used as  $I(t)$  in Eqn. 1. Based on the specific  $T_2$  value of each sample, the echo numbers were optimized (400-2000) to get the proper signal decay curve.

## 2. $\gamma$ -Globulin solutions

For  $\gamma$ -globulin solutions, the NMR experiment parameter settings were same as that of BSA.

## 3. $\text{NaC}_8$

Chemical shifts of  $\text{NaC}_8$  hydrocarbon protons were obtained from 1D pre-saturation experiments. 5 s recovery delay ( $d1$ ),  $30^\circ$  excitation pulse was used and 32 transients ( $nt=32$ ) were collected. The chemical shift of the  $\text{C}^2$  methylene protons and that of the  $\text{C}^3$  methyl protons were used for plotting Figure 2a.

For the water proton  $R_2$  measurements at 9.4 T,  $nt = 4$ ,  $\tau = 1.0$  ms, and the values of  $2n\tau$  were optimized based on the  $R_2$  value of each sample. For instance, for the 0.009 M sample,  $2n\tau$  increased from 0.1 to 5 s in 13 steps; while for the 2.40 M sample,  $2n\tau$  increased from 0.1 to 2 s in 9 steps.

For the water proton  $R_2$  measurements in  $\text{NaC}_8$  solutions at 0.47 T, the NMR parameters were the same as those for BSA.

## 4. $\text{NaFC}_8$

For  $\text{NaFC}_8$  solutions, the parameter settings for the water proton  $R_2$  measurements were same as those of  $\text{NaC}_8$ .

## Dynamic Light Scattering (DLS) Experiments:

For DLS measurements, BSA and  $\gamma$ -globulin samples were the same as used in NMR studies. 1 mL of each sample was loaded into a cylindrical glass vial (6 mm in diameter). Data collection at 90° scattering angle started after complete equilibration at 25 °C ( $\pm 0.1$  °C) in the cavity of the light scattering setup. DLS experiments were performed with a PhotoCor Instruments instrument,<sup>S3</sup> and the software *DynaLS* (SoftScientific, Inc.) was used to process the scattering data. For a single-exponentially decaying relaxation process, the intensity autocorrelation function  $g_2(t)$  (obtained in the homodyning mode) is given as<sup>S4, S5</sup>

$$g_2(t) - 1 = A \exp[-2 \frac{t}{\tau}] \quad (2)$$

where  $A$  is the amplitude of the relaxation process,  $t$  is the “lag” (or “delay”) time of photon correlation, and  $\tau$  is the characteristic relaxation time of the polarization fluctuation which essentially gives rise to light scattering. For a diffusive relaxation process, the decay (relaxation) time  $\tau$  reflects the average time of the particle travels within the laser spot of the instrument and, thus, is related to particle mobility, and, hence, the collective diffusion coefficient  $D_c$  as<sup>S4, S5</sup>

$$\tau = \frac{1}{D_c q^2} \quad (3)$$

where  $q$  is the difference in the wave vectors between the incident and scattered light beams,

$$q = \frac{4\pi n \sin(\frac{\theta}{2})}{\lambda} \quad (4)$$

$n$  is the refractive index of the solvent (1.33245095 for water),  $\lambda$  is the wavelength of the incident light in vacuum ( $\lambda = 633$  nm for a He–Ne laser), and  $\theta$  is the scattering angle (90°). Thus,  $q = 0.0187 \text{ nm}^{-1}$ . For mono-disperse, non-interacting, spherical Brownian particles, the hydrodynamic radius  $R_h$  can be calculated with the Stokes-Einstein relation<sup>S4, S5</sup>

$$R_h = \frac{k_B T}{6\pi\eta D_c} \quad (5)$$

where  $k_B$  is Boltzmann's constant ( $1.381 \times 10^{-23}$  J/K),  $T$  is the absolute temperature (298 Kelvin), and  $\eta$  is the viscosity of the solvent ( $8.93904021 \times 10^{-4}$  Pa·s for water at 25°C). The mean values  $R_h$  of the observed size distributions of the aggregates were used to obtain the average molecular weight of the aggregates based on the known relationship<sup>S6</sup> of the  $R_h$  and number average molecular weight of the polymer  $\overline{\text{M.W.}}$ :

$$R_h \sim \overline{\text{M.W.}}^{0.5} \quad (6)$$

Figure S1.  $^1\text{H}$  spectrum of 15 mg/ml BSA (Fig. S1a and S1c) and  $\gamma$ -globulin solutions (Fig. S1b and S1d). (a) and (b), without water suppression: the water signal are sharp and very easy to be detected (only 1 scan), while the protein signal are invisible at the same condition. (c) and (d), with pre-saturation water suppression: even with 100 scans, the protein proton signal are still weak and complex.

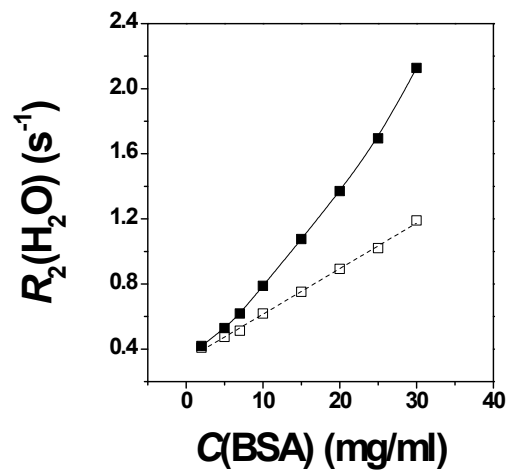

Figure S2. Water proton  $R_2$  vs. BSA concentration without (open squares) and with (solid squares) heat-induced aggregation. In the absence of aggregation, a linear relationship between the water proton  $R_2$  and BSA is observed. At a given BSA concentration, aggregation caused a jump of the water proton  $R_2$ .

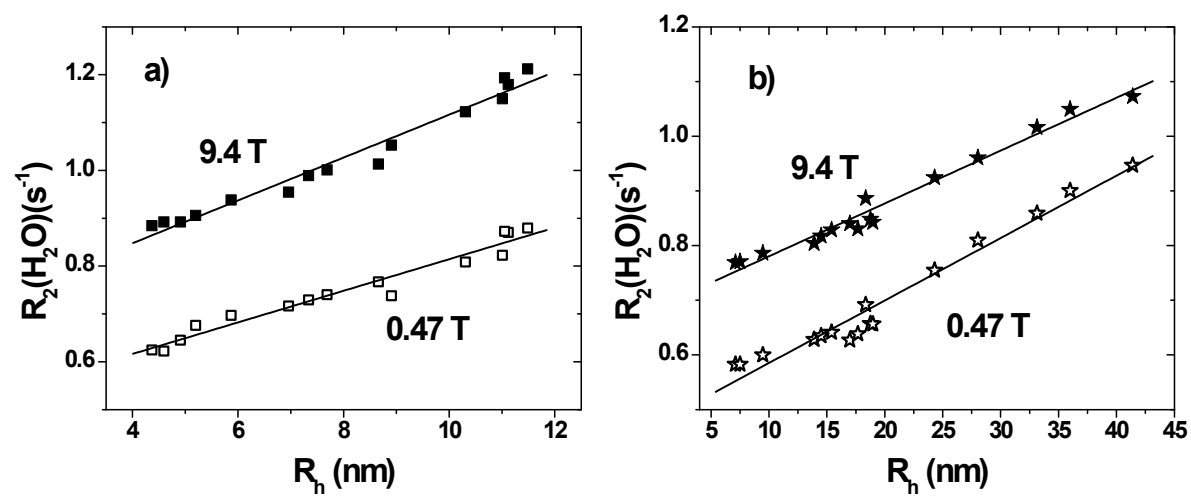

Figure S3. Water proton  $R_2$  vs  $R_h$  of a) BSA and b)  $\gamma$ -globulin detected at 9.4 T and 0.47 T.

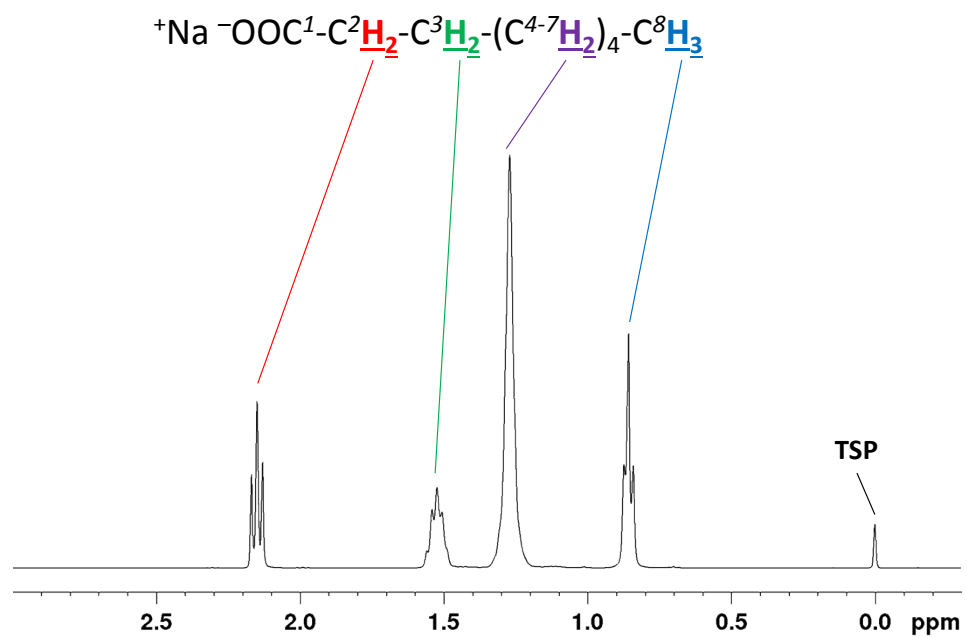

Figure S4. Structure of  $\text{NaC}_8$  and its  $^1\text{H}$  spectrum. TSP is the chemical shift reference.

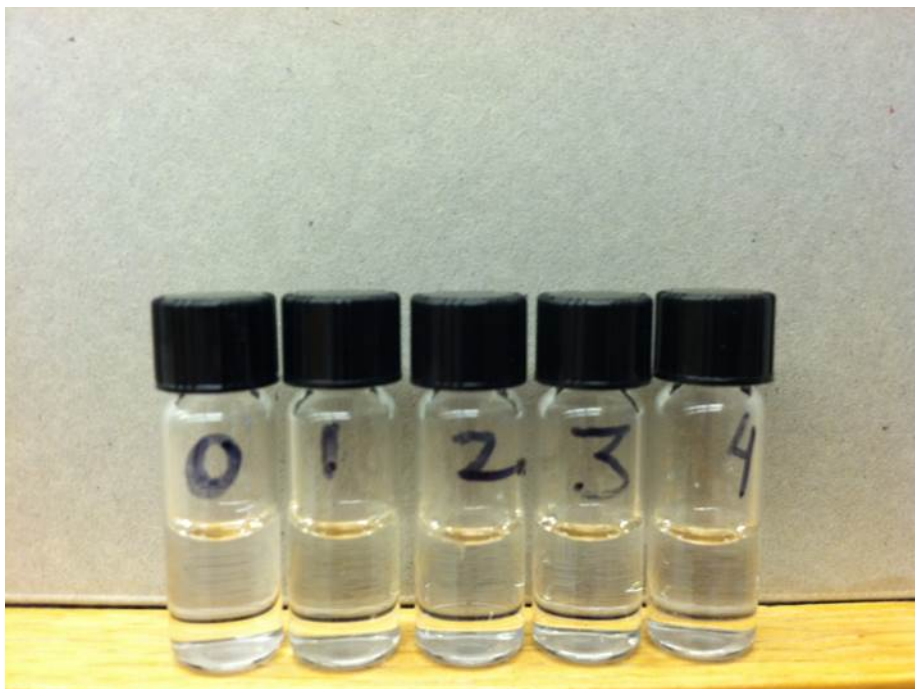

Figure S5. Protein aggregation is not always visually obvious. Vial #0: phosphate buffered saline (PBS), Vial #1: bovine serum albumin (BSA,  $4.5 \times 10^{-4}$  M) in PBS; Vial #2: BSA ( $2.3 \times 10^{-4}$  M) after 30 min heating to  $60^\circ\text{C}$ ; Vial #3: BSA ( $1.5 \times 10^{-4}$  M) after 30 min heating to  $60^\circ\text{C}$ ; Vial #4: BSA ( $7.5 \times 10^{-5}$  M) after 30 min heating to  $60^\circ\text{C}$ . Aggregates are absent in Vials 0, 1; and aggregates are present in Vials 2, 3, 4.

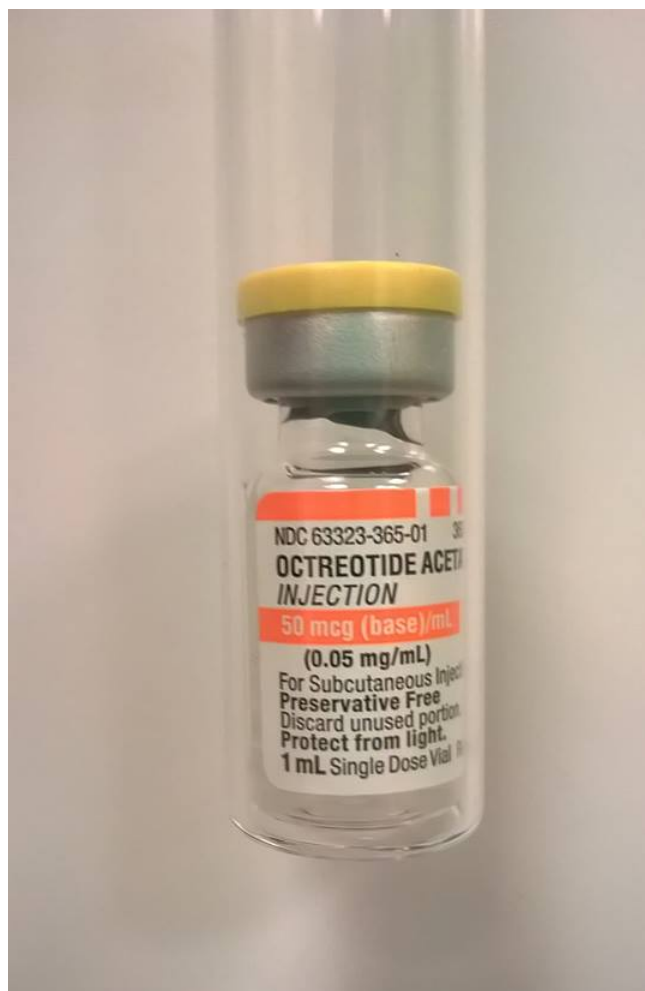

Figure S6. A sealed vial of a pharmaceutical product can be loaded into a benchtop NMR tube for water proton  $R_2$  measurement.

**Table S1. Diamagnetic Susceptibility of Compounds**

| Compound                                                | $\chi_v (\times 10^{-6})$ | $\Delta\chi_v (\times 10^{-6})$ |
|---------------------------------------------------------|---------------------------|---------------------------------|
| H <sub>2</sub> O                                        | -9.05                     | 0                               |
| Partially fluorinated                                   |                           |                                 |
| C <sub>6</sub> H <sub>5</sub> CH <sub>3</sub> (toluene) | -7.75                     | 1.29                            |
| C <sub>6</sub> H <sub>5</sub> CF <sub>3</sub>           | -7.84                     | 1.21                            |
| 2-CH <sub>3</sub> -phenol<br>(m-cresol)                 | -8.67                     | 0.38                            |
| 2-CF <sub>3</sub> -phenol                               | -8.66                     | 0.39                            |
| C <sub>6</sub> H <sub>6</sub>                           | -7.73                     | 1.32                            |
| C <sub>6</sub> H <sub>5</sub> F                         | -7.82                     | 1.23                            |
| CH <sub>3</sub> CH <sub>2</sub> OH                      | -7.25                     | 1.80                            |
| CHF <sub>2</sub> CH <sub>2</sub> OH                     | -8.14                     | 0.90                            |
| Perfluorinated                                          |                           |                                 |
| n-C <sub>6</sub> H <sub>14</sub>                        | -7.14                     | 1.91                            |
| n-C <sub>6</sub> F <sub>14</sub>                        | -8.36                     | 0.69                            |
| c-C <sub>6</sub> H <sub>10</sub>                        | -7.20                     | 1.85                            |
| c-C <sub>6</sub> F <sub>10</sub>                        | -8.07                     | 0.98                            |
| CH <sub>3</sub> COOH                                    | -12.94                    | -3.90                           |
| CF <sub>3</sub> COOH                                    | -7.29                     | 1.76                            |
| C <sub>2</sub> H <sub>5</sub> COOH                      | -7.24                     | 1.81                            |
| C <sub>2</sub> F <sub>5</sub> COOH                      | -7.30                     | 1.75                            |
| C <sub>3</sub> H <sub>7</sub> COOH                      | -7.50                     | 1.55                            |
| C <sub>3</sub> F <sub>7</sub> COOH                      | -7.83                     | 1.22                            |

Notes:

1. For each pair of compound, the hydrogenated one is in black while the fluorinated one is in blue. In each pair, the fluorinated compound has smaller diamagnetic susceptibility contrast  $\Delta\chi_v (= \chi_v(\text{compound}) - \chi_v(\text{water}))$  with water than the hydrogenated one.
2. The volume diamagnetic susceptibility  $\chi_v$  of a compound was calculated from the molar diamagnetic susceptibility  $\chi_m$ , the density and the molecular weight of that compound listed in reference,<sup>S7, S8</sup> and converted to the SI unit. Unfortunately, there is no published data on  $\chi_v$  of NaFC<sub>8</sub>. But the three perfluorinated carboxylic acids in this Table all have  $\chi_v$  values closer to water than their hydrogenated counterparts.

## References:

- S1 P. Ekwall, *Chemistry, Physics and Application of Surface Active Substances, Vol. 2*, ed. J. Th. G. Overbeek, Gordon and Breach, New York, 1967, pp. 651.
- S2 S. Meiboom, D. Gill, *Rev. Sci. Instrum.*, 1958, **29**, 688.
- S3 D. Subramanian, et al. *J. Chem. Eng. Data*, 2011, **56**, 1238.
- S4 B. Chu, *Laser Light Scattering: Basic Principles and Practice*, Academic Press, Boston, 1991.
- S5 B. J. Berne, R. Pecora, *Dynamic Light Scattering: With Applications to Chemistry, Biology, and Physics*, Dover Publications, Mineola, NY, 2000.
- S6 M. Adam, M. Delsanti, *Macromolecules*, 1977, **10**, 1229.
- S7 *CRC Handbook of Chemistry and Physics*, ed. D. R. Lide, CRC Press, Boca Raton, 84th edn., 2003-2004.
- S8 R. Perceau, *Compt. Rend.*, 1954, **239**, 170-171.
